# Supplementary material
Source: PubMed Central journal article supplement (PMC2000664)

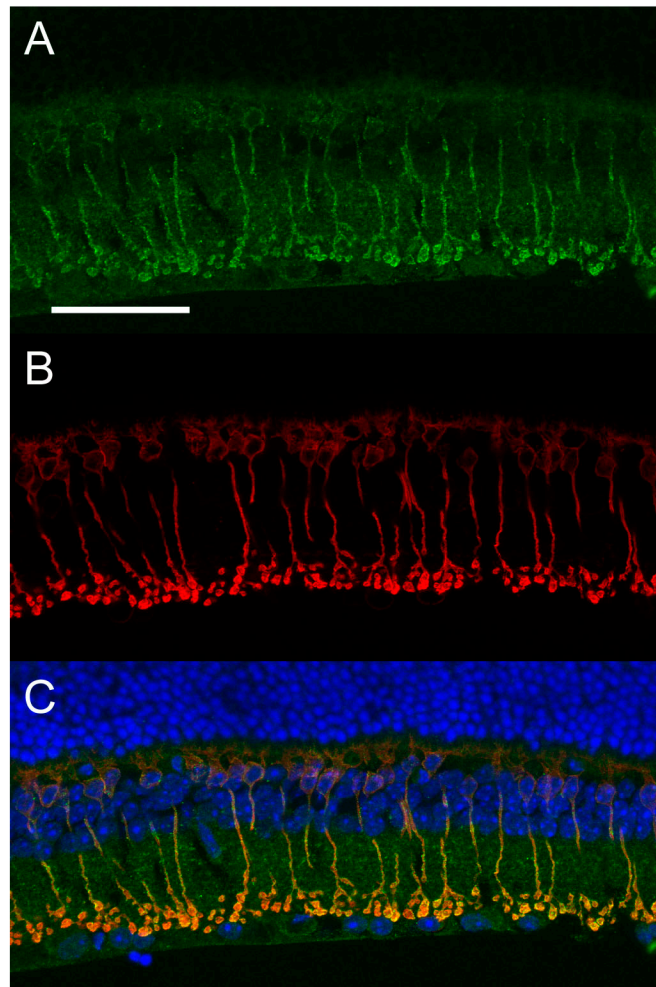

Supplemental Figure 1

Supplement: tjp0577-0221_sd1.pdf [file tjp0577-0221_sd1.pdf]
